# Supplementary material for: Orphan Toxin OrtT (YdcX) of Escherichia coli Reduces Growth during the Stringent Response
Source: MDPI journal article supplement (doi:10.3390/toxins7020299), 2015-01-29
Supplement: s1 [file s1]

# Supplementary Information

## *Supplementary Methods*

**Tricine-SDS-PAGE.** To investigate if YdcY is a protein, a tricine-SDS-PAGE was performed. BW25113 wild-type strains carrying pCA24N, pCA24N-*ycdY*, and pCA24N-*ghoS* (positive control) were grown to an optical density at 600 nm of 0.25 in LB with chloramphenicol, then 1 mM IPTG was added to induce *ycdY* and *ghoS* expression for 4 h. One mL cell samples were harvested by centrifugation and lysed with 10% SDS to a final concentration of 0.4% SDS. The protein concentration was measured using a Pierce™ BCA Protein assay kit (Thermo Scientific™, Rockford, IL, USA). Ten µg of total cell protein for each sample was denatured at 95 °C for 10 min and loaded for SDS-PAGE analysis. The tricine-SDS-PAGE was performed as described earlier [70].

**Western blot analysis.** To detect OrtT F38R, BW25113 wild-type strains carrying pCA24N, pCA24N-*ortTF38R*, and pCA24N-*ghoS* (positive control) were grown to a turbidity at 600 nm of 0.15 in LB with chloramphenicol, then 0.2 mM IPTG was added to induce *ycdY* and *ghoS* expression for 3 h. Cell samples (5 mL) were harvested by centrifugation and prepared for tricine-SDS-PAGE as described above. Western blot analysis was performed as described previously [18] with 20 µg of total cell protein.

**Table S1.** Summary of qRT-PCR results. The cycle number ( $C_t$ ) for each sample is indicated for target gene, *ortT* as well as the housekeeping gene, *gyrA*, which was used to normalize the data. Fold changes in transcription were calculated using [66]:  $2^{-(C_{t \text{ } ortT, \text{ treatment}} - C_{t \text{ } gyrA, \text{ treatment}})/2^{-(C_{t \text{ } ortT, \text{ control}} - C_{t \text{ } gyrA, \text{ control}})}}$ . The specificity of the qRT-PCR products were verified by melting curve analysis [66].

| Stringent Condition | Strain                      | Condition           | Biological Replicate | $C_t$ ( <i>ortT</i> ) | $C_t$ ( <i>gyrA</i> ) | Fold Change     |
|---------------------|-----------------------------|---------------------|----------------------|-----------------------|-----------------------|-----------------|
| TMP treatment       | BW25113                     | Control             | #1                   | 23.73 $\pm$ 0.09      | 21.04 $\pm$ 0.25      | 4.53 $\pm$ 0.01 |
|                     |                             | TMP                 |                      | 24.91 $\pm$ 0.05      | 24.40 $\pm$ 0.01      |                 |
|                     |                             | Control             | #2                   | 24.45 $\pm$ 0.08      | 26.60 $\pm$ 0.37      | 1.70 $\pm$ 0.30 |
|                     |                             | TMP                 |                      | 24.83 $\pm$ 0.11      | 27.72 $\pm$ 0.39      |                 |
| RelA production     | BW25113/pCA24N              | pCA24N              | #1                   | 23.58 $\pm$ 0.22      | 24.29 $\pm$ 0.05      | 2.94 $\pm$ 0.19 |
|                     | BW25113/pCA24N- <i>relA</i> | pCA24N- <i>relA</i> |                      | 25.36 $\pm$ 0.02      | 27.63 $\pm$ 0.22      |                 |
|                     | BW25113/pCA24N              | pCA24N              | #2                   | 22.86 $\pm$ 0.04      | 19.38 $\pm$ 0.01      | 1.74 $\pm$ 0.66 |
|                     | BW25113/pCA24N- <i>relA</i> | pCA24N- <i>relA</i> |                      | 26.36 $\pm$ 0.62      | 23.68 $\pm$ 0.02      |                 |
| MUP treatment       | BW25113                     | Control             | #1                   | 23.43 $\pm$ 0.19      | 26.05 $\pm$ 0.43      | 4.14 $\pm$ 0.12 |
|                     |                             | MUP                 |                      | 23.96 $\pm$ 0.02      | 28.73 $\pm$ 0.09      |                 |
|                     |                             | Control             | #2                   | 24.26 $\pm$ 0.14      | 24.92 $\pm$ 0.07      | 5.08 $\pm$ 0.26 |
|                     |                             | MUP                 |                      | 24.84 $\pm$ 0.18      | 27.84 $\pm$ 0.14      |                 |
| SHX treatment       | BW25113                     | Control             | #1                   | 22.18 $\pm$ 0.16      | 22.96 $\pm$ 0.00      | 9.13 $\pm$ 0.60 |
|                     |                             | SHX                 |                      | 21.58 $\pm$ 0.01      | 25.55 $\pm$ 0.43      |                 |
|                     |                             | Control             | #2                   | 24.23 $\pm$ 0.51      | 20.08 $\pm$ 0.01      | 168 $\pm$ 0.34  |
|                     |                             | SHX                 |                      | 34.06 $\pm$ 0.28      | 37.30 $\pm$ 0.25      |                 |
| Heat shock          | BW25113                     | Control             | #1                   | 22.94 $\pm$ 0.15      | 22.79 $\pm$ 0.03      | 2.1 $\pm$ 0.02  |
|                     |                             | Heat                |                      | 22.98 $\pm$ 0.04      | 23.93 $\pm$ 0.03      |                 |
|                     |                             | Control             | #2                   | 22.95 $\pm$ 0.44      | 22.14 $\pm$ 0.07      | 1.8 $\pm$ 0.40  |
|                     |                             | Heat                |                      | 22.34 $\pm$ 0.08      | 22.42 $\pm$ 0.46      |                 |

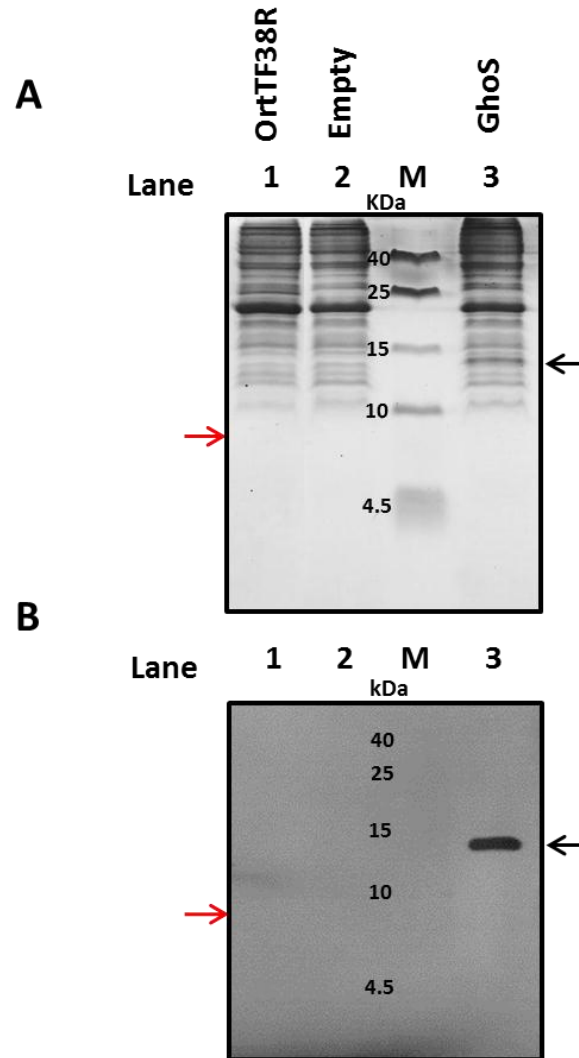

**Figure S1.** Western blot analysis of OrtTF38R. His-tagged OrtTF38R and His-tagged GhoS (positive control) were visualized by tricine-SDS-PAGE (**A**) and a Western blot (**B**). Empty plasmid pCA24N was used as the negative control (lane 2). Twenty  $\mu$ g of total cell proteins were loaded on the gel and the expected sizes of OrtTF38R (8.89 kDa) and GhoS (13.8 kDa) are indicated by a red and a black arrow, respectively. Plasmid abbreviations: OrtTF38R, pCA24N-*ortTF38R*; Empty, pCA24N; GhoS, pCA24N-*ghoS*.

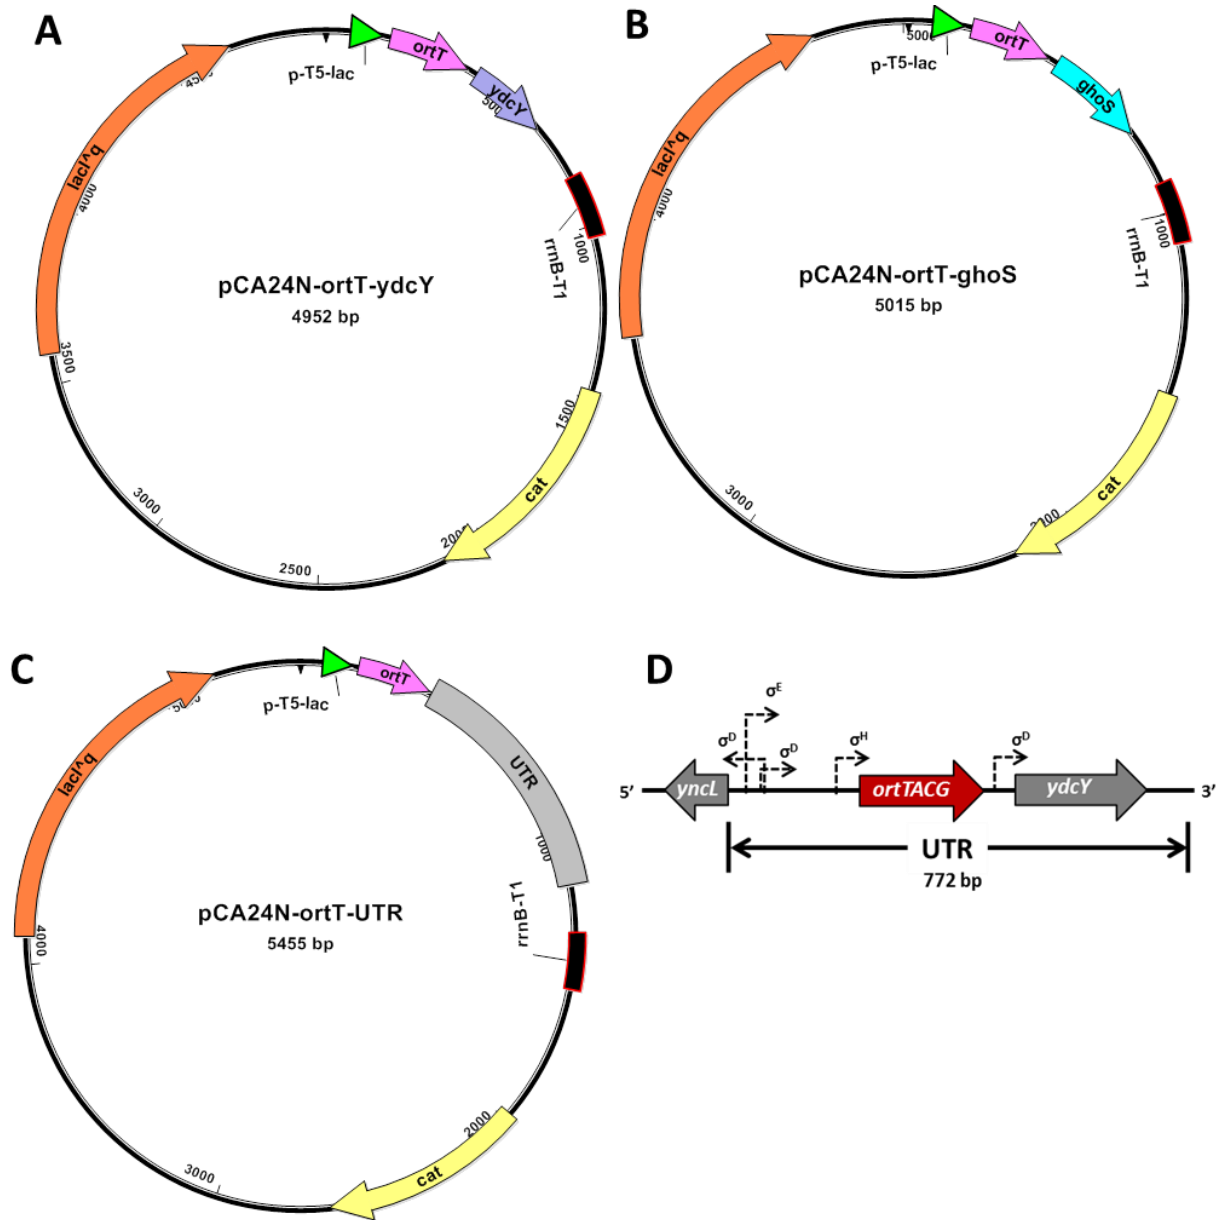

**Figure S2.** Plasmid maps for finding antitoxin for OrtT. (A) pCA24N-*ortT*-*ycdY* with both *ortT* and *ycdY* under control of the  $P_{T5-lac}$  promoter; (B) pCA24N-*ortT*-*ghoS* with both *ortT* and *ghoS* under control of the  $P_{T5-lac}$  promoter; (C) pCA24N-*ortT*-UTR with both *ortT* and the UTR (*ortT* flanking region from the chromosome) under control of the  $P_{T5-lac}$  promoter; (D) UTR construction using the upstream intergenic region (between *yncL* and *ortT*), an inactivated *ortT* (*ortTACG*), and the downstream intergenic region including *ycdY* for investigating the presence of a small RNA antitoxin partner for OrtT.

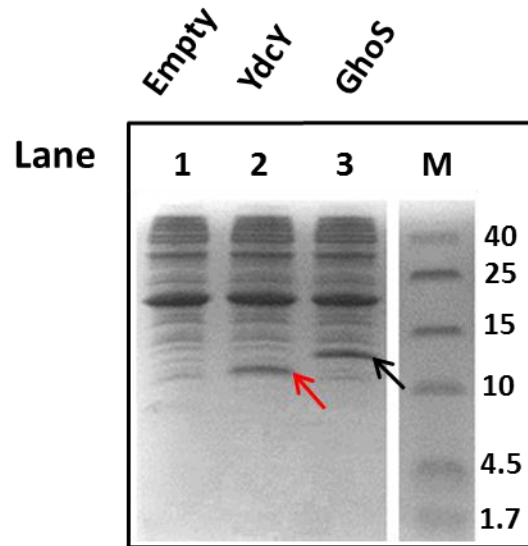

**Figure S3.** YdcY is a protein. His-tagged YdcY and his-tagged GhoS were produced from pCA24N-*ycdY* and pCA24N-*ghoS* and visualized by tricine-SDS-PAGE. Empty plasmid pCA24N was used as the negative control. Ten  $\mu$ g of total cell proteins were loaded on the gel and the expected sizes of YdcY (11.14 KDa) and GhoS (13.8 KDa) are indicated by a red and a black arrow, respectively. Plasmid abbreviations: Empty, pCA24N; YcdY, pCA24N-*ycdY*; GhoS, pCA24N-*ghoS*.

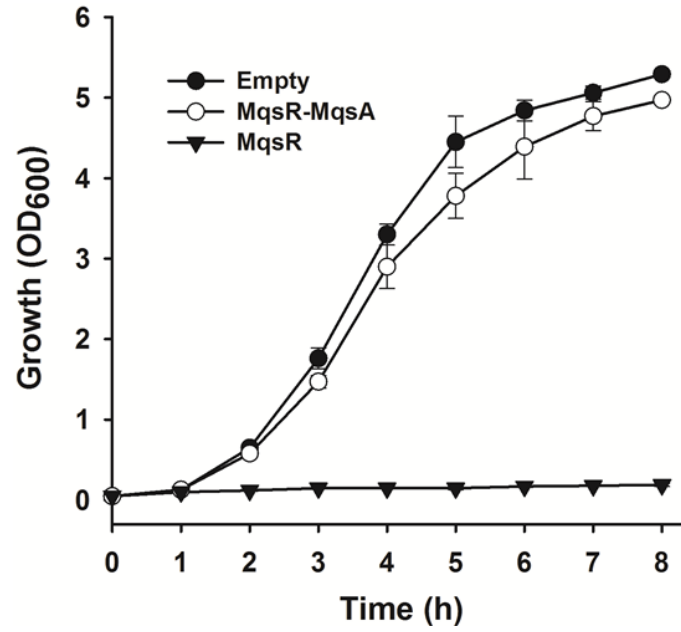

**Figure S4.** Co-expression of *mqsR* and *mqsA* from the same promoter. Growth of BW25113  $\Delta mqsR$   $\Delta mqsA$   $\Delta Kan$  cells harboring pBS(Kan) (empty plasmid), pBS(Kan)-*mqsR*, and pBS(Kan)-*mqsR-mqsA* in LB medium with kanamycin (50  $\mu$ g/mL) to retain the plasmids along with 1 mM IPTG to induce protein production after 1 h.

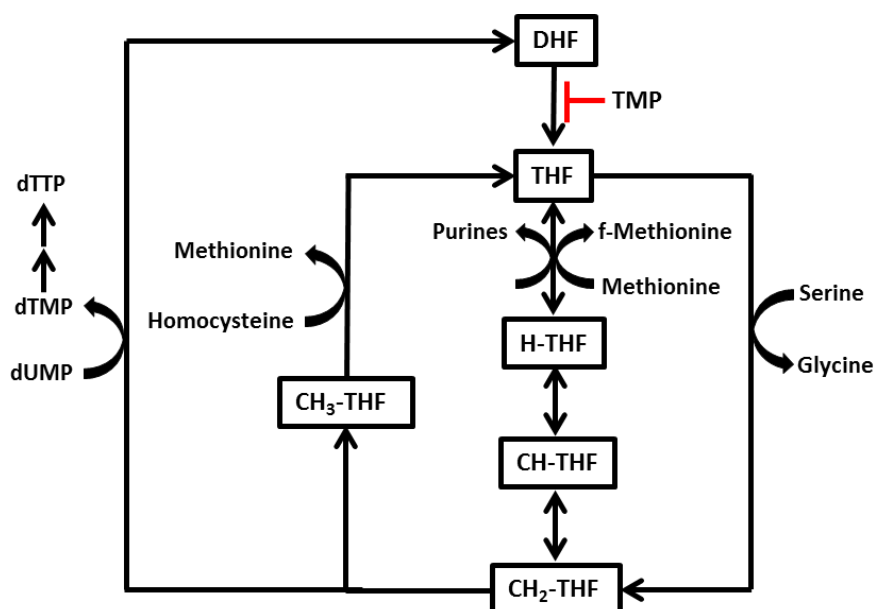

**Figure S5.** Tetrahydrofolate-related pathways. Abbreviations: TMP, trimethoprim; DHF, dihydrofolate; THF, tetrahydrofolate; H-THF, formyltetrahydrofolate; CH-THF, 5,10-methenyltetrahydrofolate; CH<sub>2</sub>-THF, 5,10-methylenetetrahydrofolate; CH<sub>3</sub>-THF, 5-methyltetrahydrofolate; Met, methionyl-tRNA<sup>fMet</sup>; f-Met, formylmethionyl-tRNA<sup>fMet</sup>.

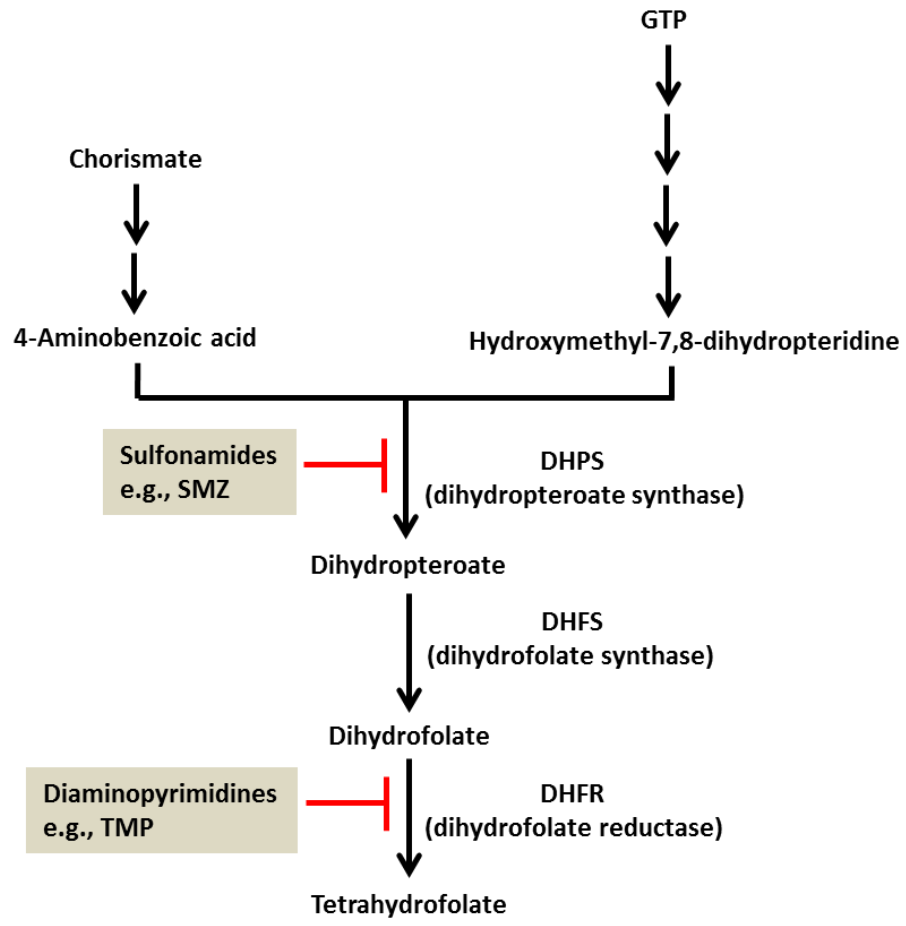

**Figure S6.** Tetrahydrofolate biosynthesis synthesis pathway.
